# Supplementary material
Source: HighWire-hosted journal article supplement (https://bmjopen.bmj.com/content/14/8/e086683)
Supplement: inline-supplementary-material-1 [file inline-supplementary-material-1.pdf]

Supplementary Information

Interactive Visualization of Patients Pain Trajectories and Chronicity Probability

For the visualization of all participants, see: <https://rstudio-connect.hu.nl/painr-app/>. In this visualization, "FALSE" indicates no chronic pain (pain < 3 at 6 weeks, 3 months, and 6 months), while "TRUE" denotes chronic pain (pain ≥ 3 at all time-points: 6 weeks, 3 months, and 6 months). The X-axis represents the pain score, measured using the Numerical Pain Rating Scale (0-10), and the Y-axis shows the cumulative number of days after the baseline measurement. "Patient\_code" is a unique identifier for each patient. "LP" stands for linear predictor, "Prob" represents the probability of chronicity, and "Perc" indicates the percentual probability of chronicity. The bar graph and various values per variable illustrate the regression coefficient, multiplied by the patient data at baseline, across different variables from the prognostic model.

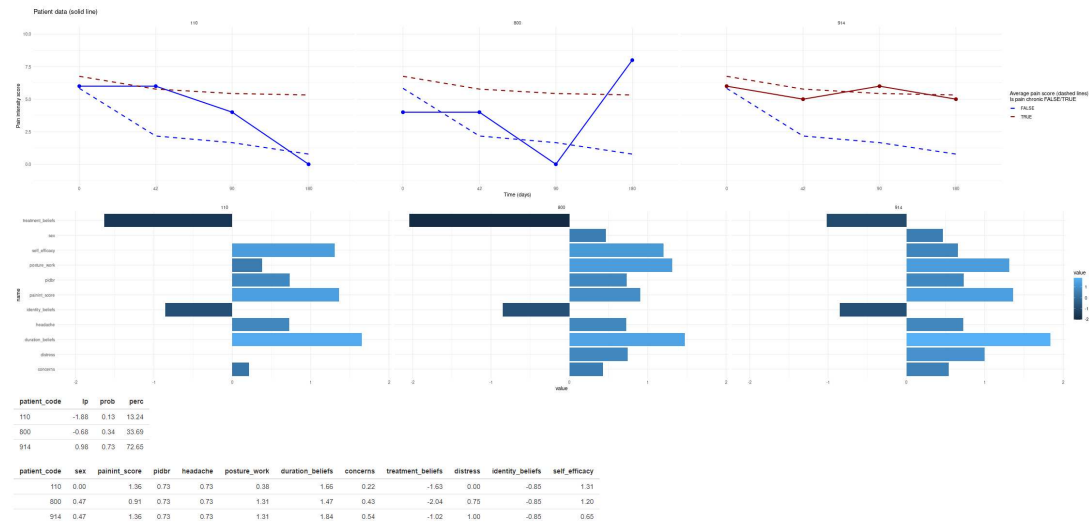

13 **Supplementary Information**14 **Appendix 1. TRIPOD Checklist Prediction Model Development and Validation**

15

| Section/Topic                | 1   | Checklist Item                                                                                                                                                                                        | Page           |
|------------------------------|-----|-------------------------------------------------------------------------------------------------------------------------------------------------------------------------------------------------------|----------------|
| <b>Title and abstract</b>    |     |                                                                                                                                                                                                       |                |
| Title                        | 1   | Identify the study as developing and/or validating a multivariable prediction model, the target population, and the outcome to be predicted.                                                          | 1              |
| Abstract                     | 2   | Provide a summary of objectives, study design, setting, participants, sample size, predictors, outcome, statistical analysis, results, and conclusions.                                               | 2              |
| <b>Introduction</b>          |     |                                                                                                                                                                                                       |                |
| Background and objectives    | 3a  | Explain the medical context (including whether diagnostic or prognostic) and rationale for developing or validating the multivariable prediction model, including references to existing models.      | 5-6            |
|                              | 3b  | Specify the objectives, including whether the study describes the development or validation of the model or both.                                                                                     | 5-6            |
| <b>Methods</b>               |     |                                                                                                                                                                                                       |                |
| Source of data               | 4a  | Describe the study design or source of data (e.g., randomized trial, cohort, or registry data), separately for the development and validation data sets, if applicable.                               | 7              |
|                              | 4b  | Specify the key study dates, including start of accrual; end of accrual; and, if applicable, end of follow-up.                                                                                        | 7              |
| Participants                 | 5a  | Specify key elements of the study setting (e.g., primary care, secondary care, general population) including number and location of centres.                                                          | 7-8            |
|                              | 5b  | Describe eligibility criteria for participants.                                                                                                                                                       | 7-8            |
|                              | 5c  | Give details of treatments received, if relevant.                                                                                                                                                     | Not applicable |
| Outcome                      | 6a  | Clearly define the outcome that is predicted by the prediction model, including how and when assessed.                                                                                                | 8              |
|                              | 6b  | Report any actions to blind assessment of the outcome to be predicted.                                                                                                                                | 7-8            |
| Predictors                   | 7a  | Clearly define all predictors used in developing or validating the multivariable prediction model, including how and when they were measured.                                                         | 8-10           |
|                              | 7b  | Report any actions to blind assessment of predictors for the outcome and other predictors.                                                                                                            | 7-8            |
| Sample size                  | 8   | Explain how the study size was arrived at.                                                                                                                                                            | 10             |
| Missing data                 | 9   | Describe how missing data were handled (e.g., complete-case analysis, single imputation, multiple imputation) with details of any imputation method.                                                  | 10-11          |
| Statistical analysis methods | 10a | Describe how predictors were handled in the analyses.                                                                                                                                                 | 10-11          |
|                              | 10b | Specify type of model, all model-building procedures (including any predictor selection), and method for internal validation.                                                                         | 10-11          |
|                              | 10d | Specify all measures used to assess model performance and, if relevant, to compare multiple models.                                                                                                   | 10-11          |
| Risk groups                  | 11  | Provide details on how risk groups were created, if done.                                                                                                                                             | Not applicable |
| <b>Results</b>               |     |                                                                                                                                                                                                       |                |
| Participants                 | 13a | Describe the flow of participants through the study, including the number of participants with and without the outcome and, if applicable, a summary of the follow-up time. A diagram may be helpful. | 12-16          |
|                              | 13b | Describe the characteristics of the participants (basic demographics, clinical features, available predictors), including the number of participants with missing data for predictors and outcome.    | 12-16          |
| Model development            | 14a | Specify the number of participants and outcome events in each analysis.                                                                                                                               | 13             |
|                              | 14b | If done, report the unadjusted association between each candidate predictor and outcome.                                                                                                              | 17-18          |
| Model specification          | 15a | Present the full prediction model to allow predictions for individuals (i.e., all regression coefficients, and model intercept or baseline survival at a given time point).                           | 17-20          |
|                              | 15b | Explain how to use the prediction model.                                                                                                                                                              | 23-24          |
| Model performance            | 16  | Report performance measures (with CIs) for the prediction model.                                                                                                                                      | 19-22          |
| <b>Discussion</b>            |     |                                                                                                                                                                                                       |                |
| Limitations                  | 18  | Discuss any limitations of the study (such as nonrepresentative sample, few events per predictor, missing data).                                                                                      | 28             |
| Interpretation               | 19b | Give an overall interpretation of the results, considering objectives, limitations, and results from similar studies, and other relevant evidence.                                                    | 25-28          |

|                           |    |                                                                                                                               |       |
|---------------------------|----|-------------------------------------------------------------------------------------------------------------------------------|-------|
| Implications              | 20 | Discuss the potential clinical use of the model and implications for future research.                                         | 28-29 |
| Other information         |    |                                                                                                                               |       |
| Supplementary information | 21 | Provide information about the availability of supplementary resources, such as study protocol, Web calculator, and data sets. | 30    |
| Funding                   | 22 | Give the source of funding and the role of the funders for the present study.                                                 | 30    |

16  
17

18 **Supplementary Information**19 **Appendix 2 Table of contents**

20

21 **Link Github:**22 <https://github.com/uashogeschoolutrecht/painr>

23 Table of Contents Published with Bookdown:

24 **0. Introduction**

25 0.1 Data Flow

26

27 **1. Exploratory Data Analysis – Raw Data**

28 1.1 Suggested improvements of the code

29 1.2 Packages

30 1.3 Load data

31 1.4 First glimpse at missingness

32 1.5 Select relevant variables

33 1.6 Exploratory Data Analysis

34 1.7 Write table with all labels

35 1.8 Deal with ‘work’ variables

36 1.9 Recode physical\_activity

37 1.10 Write subsetted data to disk

38

39 **2. Imputation of missing values**

40 2.1 Packages

41 2.2 Data

42 2.3 Prepare dataset for imputing

43 2.4 Convert all categorical vars to factors

44 2.5 Panel with all distributions

45 2.6 Imputation of missing values

46 2.7 Checking Missing Completely at Random (MCAR)

47 2.8 Missingness pattern

48 2.9 Define predictors to include in the imputations

49 2.10 Using the MICE package for imputation of missing values

50 2.11 Create predictorMatrix for MICE

51 2.12 Calculate percentage missing data and cases

52 2.13 Running the imputations

53 2.14 Inspect the imputations

54 2.15 Check convergence

55 2.16 Check for plausible values of imputation

56 2.17 Checking the used predictor matrix

57 2.18 Look at the datasets

58 2.19 Skimming the data

59 2.20 Add attitude

60 2.21 Save to disk

61

62 **3. Statistical exploration**

63 3.1 Packages

64 3.2 Data

65 3.3 Global parameters

66 3.4 Statistical analysis methods and missing data

67 3.5 Reformat dataframe to stacked format

|     |                                                                     |
|-----|---------------------------------------------------------------------|
| 68  | 3.6 Create time variable                                            |
| 69  | 3.7 Recode time                                                     |
| 70  | 3.8 Adding baseline as time=0                                       |
| 71  | 3.9 Carry forward                                                   |
| 72  | 3.10 Rework the graph above to get cumulative pain intensity scores |
| 73  | 3.11 Get individual lines for each patient                          |
| 74  | 3.12 Write to disk as excelfile and. Rds R binary file              |
| 75  | 3.13 Distribution of the data                                       |
| 76  | 3.14 Table: baseline characteristics of the included patients       |
| 77  | 3.15 Testing assumptions before backward analysis                   |
| 78  |                                                                     |
| 79  | <b>4. Prognostic model</b>                                          |
| 80  | 4.1 Packages                                                        |
| 81  | 4.2 Data load                                                       |
| 82  | 4.3 Clean data and rename vars                                      |
| 83  | 4.4 Exploratory Data Analysis                                       |
| 84  | 4.5 Variable analysis – independent predictive capacity             |
| 85  | 4.6 Relevel dichotomous variables                                   |
| 86  | 4.7 Multivariable logistic regression analysis                      |
| 87  | 4.8 AUC                                                             |
| 88  | 4.9 Calibration curve                                               |
| 89  | 4.10 Result Calibration plot                                        |
| 90  | 4.11 Hoslem and Lemeshow                                            |
| 91  | 4.12 Model fit                                                      |
| 92  | 4.13 Internal validation                                            |
| 93  | 4.14 Plot Corrected AUC                                             |
| 94  | 4.15 Results                                                        |
| 95  | 4.16 Correcting the variables coefficients                          |
| 96  | 4.17 Calibration in the Large                                       |
| 97  |                                                                     |
| 98  | <b>5. Article figures</b>                                           |
| 99  | 5.1 Packages                                                        |
| 100 | 5.2 Data load                                                       |
| 101 | 5.3 Clean data and rename variables                                 |
| 102 | 5.4 Exploratory Data Analysis                                       |
| 103 | 5.5 Variable analysis                                               |
| 104 | 5.6 Graph of model metrics                                          |
| 105 | 5.7 Relevel dichotomous variables                                   |
| 106 | 5.8 Refactor code above to a more compact version                   |
| 107 | 5.9 Univariate analysis on the categorical variables                |
| 108 | 5.10 Visualize model outcome                                        |
| 109 | 5.11 Panel plot univariate                                          |
| 110 | 5.12 Multivariable logistic regression analysis                     |
| 111 | 5.13 Backward model                                                 |
| 112 | 5.14 Visualize backward model                                       |
| 113 | 5.15 Panel plot with all models                                     |
| 114 | 5.16 Rework figure labels                                           |
| 115 | 5.17 Figures for paper                                              |
| 116 | 5.18 Adding level info to figure                                    |
| 117 | 5.19 GGpubr panel                                                   |
| 118 | 5.20 Area Under the receiver operating characteristic Curve (AUC)   |
| 119 | 5.21 Calibration curve                                              |

120 5.22 Formally testing the Goodness-of-fit using the Hosmer and Lemeshow

121 5.23 Intermezzo – linear predictors

122

123    **Supplementary Information**

124    **Appendix 3 Overview Applied interventions study population**

125    **Table Intervention included patients (N = 596)**

| Interventions                                                                 | Number of patients | Applied (%) | Number of patients | Not applied (%) |
|-------------------------------------------------------------------------------|--------------------|-------------|--------------------|-----------------|
| 1. Workplace, ergonomic and working time advice                               | 99                 | 16,6        | 497                | 83,4            |
| 2. Medical devices, collar or cervical pillow                                 | 1                  | 0,2         | 595                | 98.2            |
| 3. Joint mobilizations, manipulation, traction, nerve mobilization techniques | 509                | 85,4        | 86                 | 14,6            |
| 4. Exercise therapy                                                           | 346                | 58,1        | 250                | 41,9            |
| 5. Electrotherapy, laser, ultrasound, shockwave or heat therapy               | 0                  | 0           | 596                | 100             |
| 6. Dry needling                                                               | 492                | 17,4        | 104                | 82,6            |
| 7. Information and advice                                                     | 79                 | 86,7        | 517                | 13,3            |
| 8. Kinesiotaping                                                              | 16                 | 2,7         | 580                | 97,3            |
| 9. Massage                                                                    | 326                | 54,7        | 270                | 45,3            |

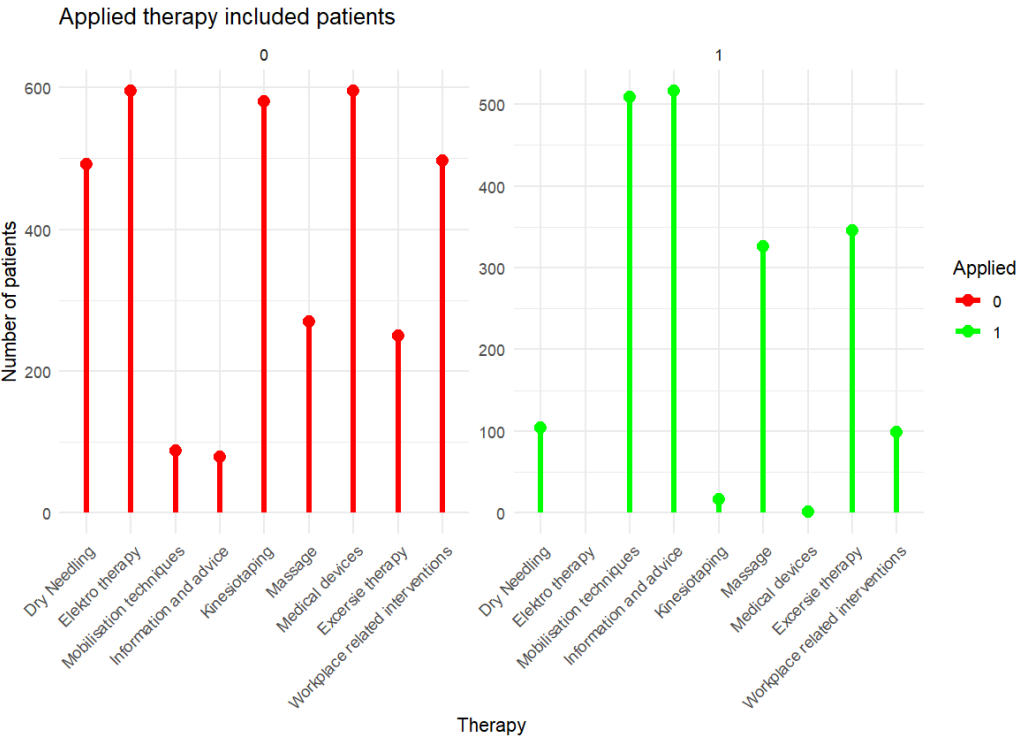

126

127    **Figure: Applied therapy included patients (N = 596)**

128
